# Supplementary material for: Arenediazonium salts as electrophiles for the oxidative addition of gold(i)
Source: Royal Society of Chemistry journal article supplement (doi:10.1039/c6cc03105f), 2016-01-01

# NMR spectra

## Arenediazonium Salts as Electrophiles for the Oxidative Addition of Gold(I)

Eric Omar Asomoza-Solis, Jonathan Rojas-Ocampo, Rubén Alfredo Toscano and Susana Porcel\*

*Instituto de Química, Universidad Nacional Autónoma de México, Circuito Exterior s/n, Ciudad Universitaria, 04510  
México D.F., México*

*Fax: +52(55)56162217*

*E-mail: sporcel@unam.mx*

### Contents

|                                       |      |
|---------------------------------------|------|
| 1. Complexes <b>3b</b> and <b>4</b> . | 2-4  |
| 2. Products of cross-coupling.        | 5-18 |

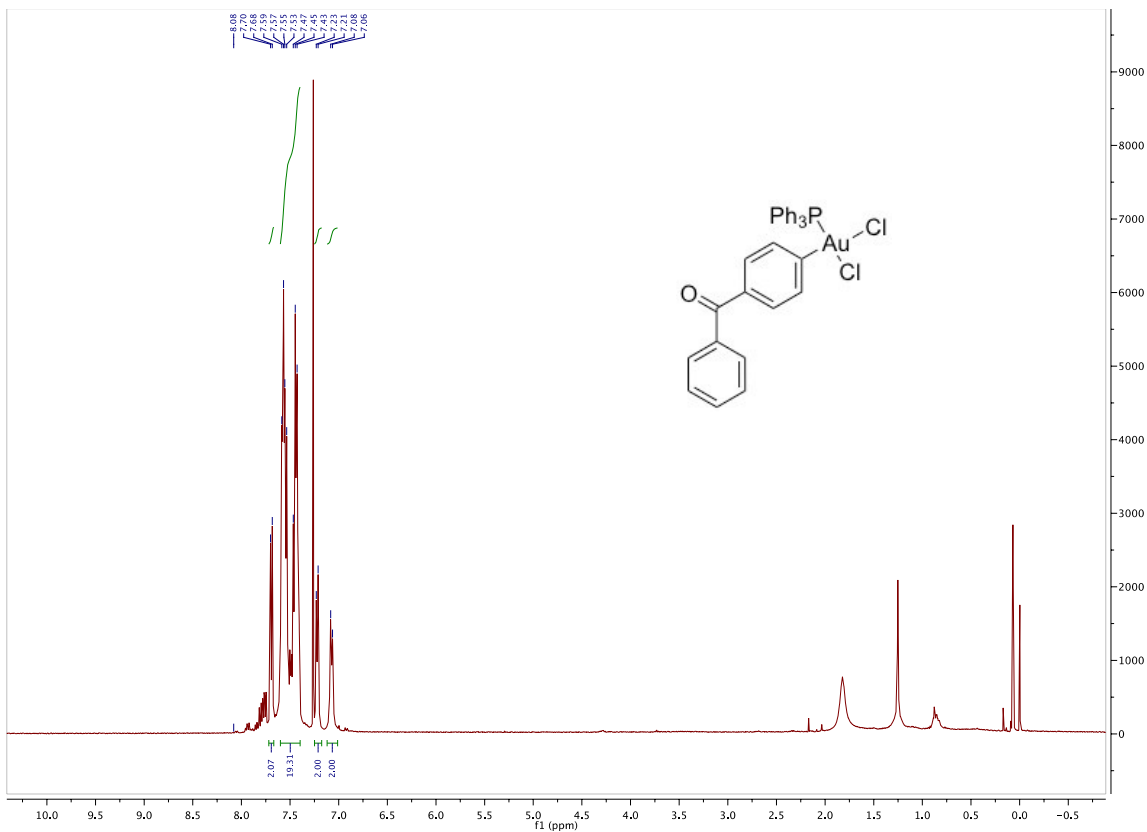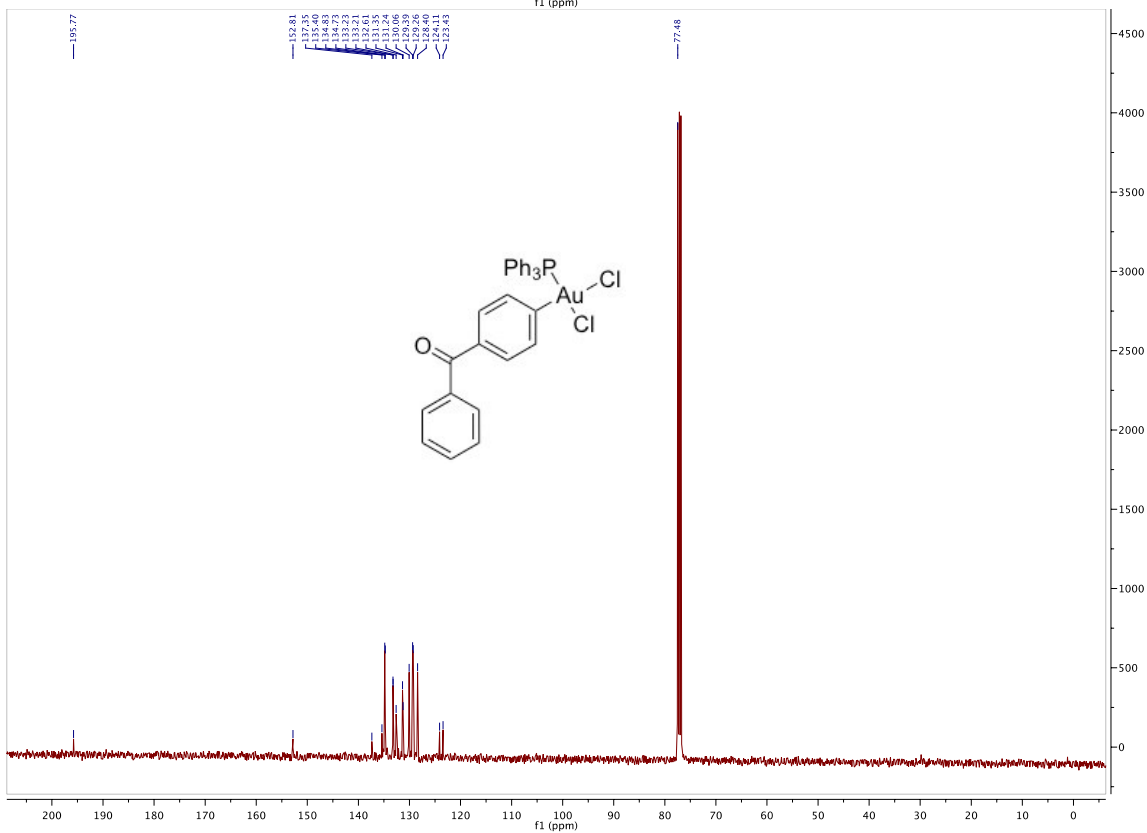

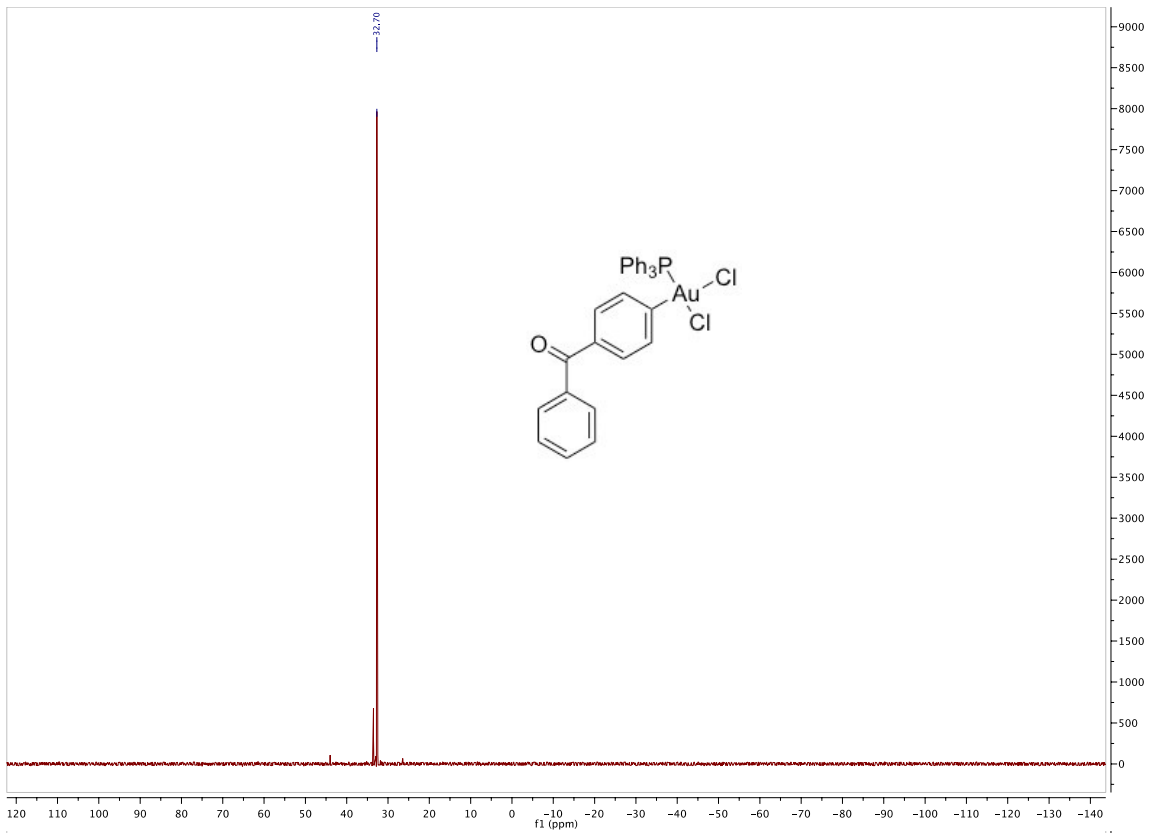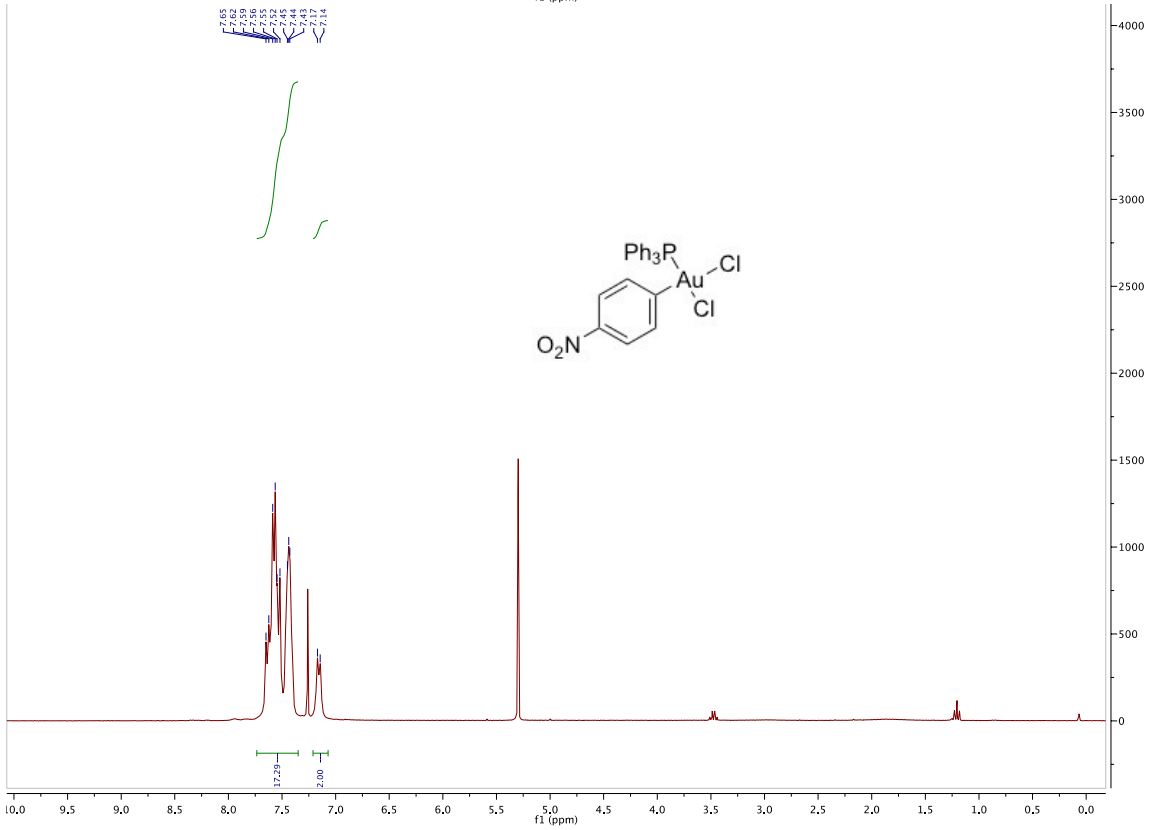

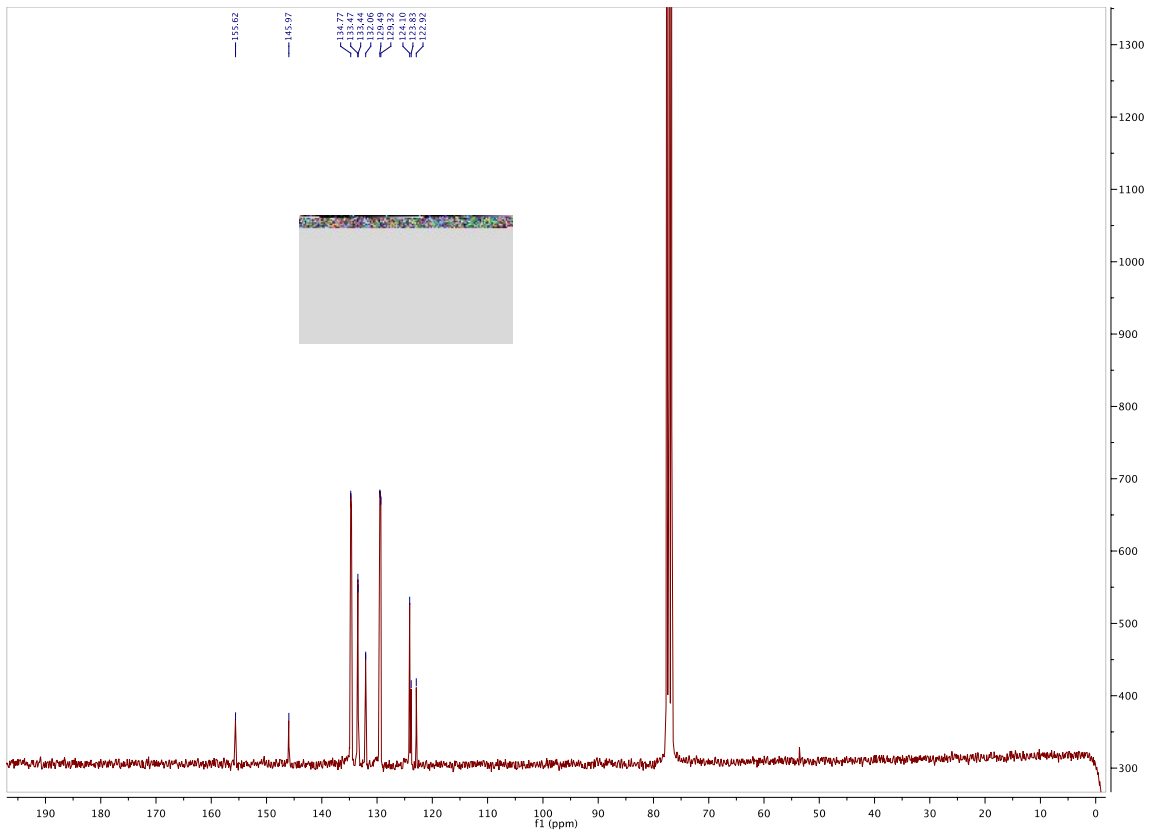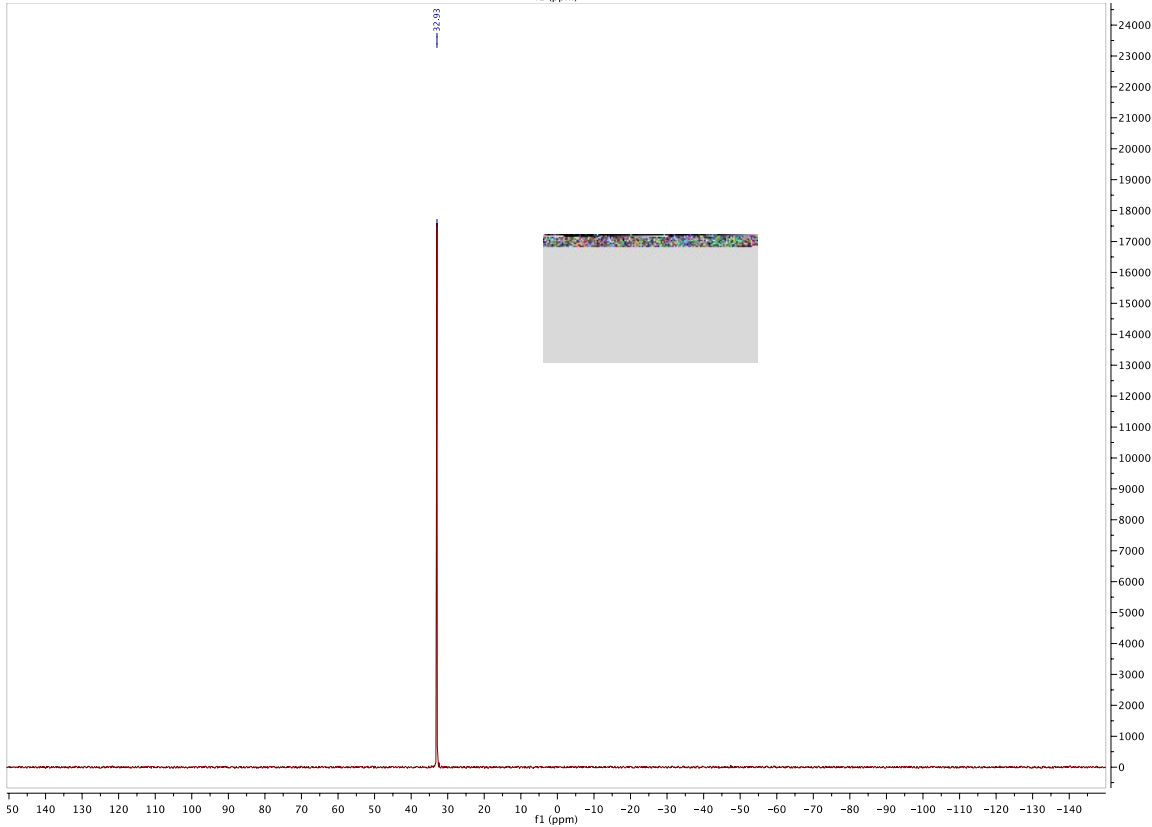

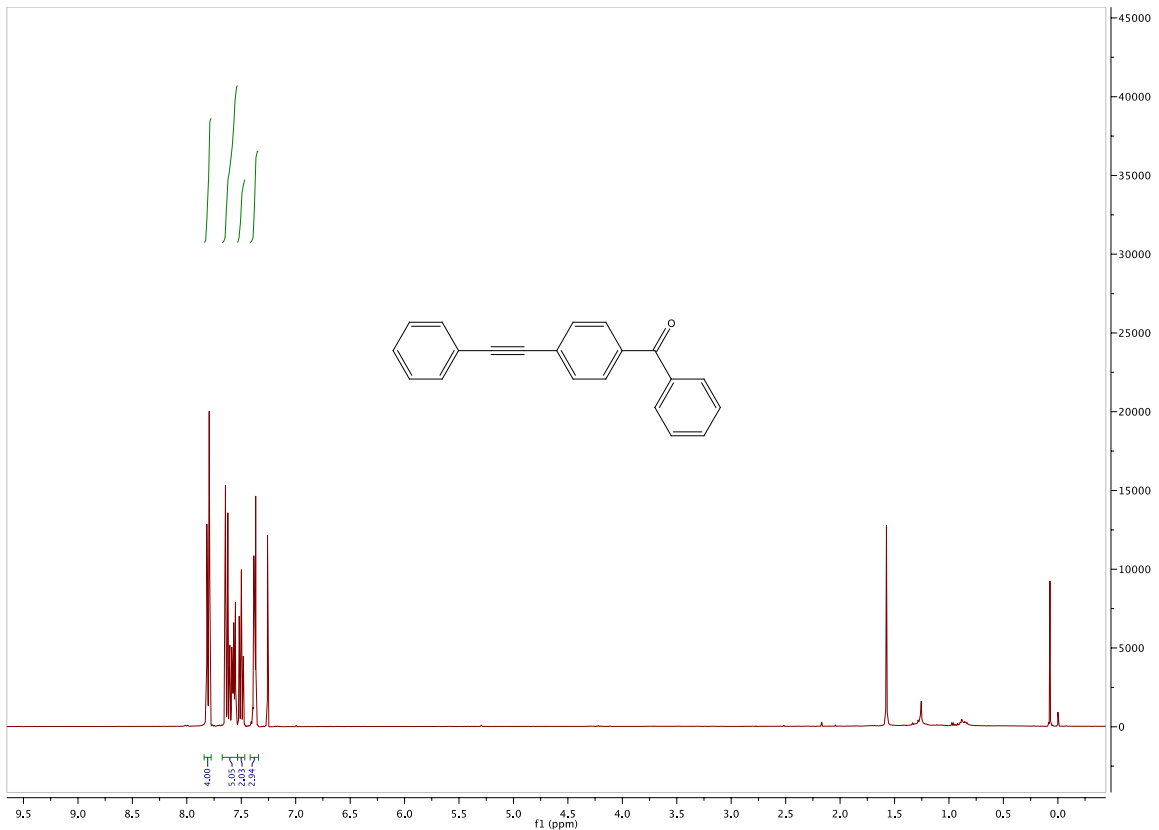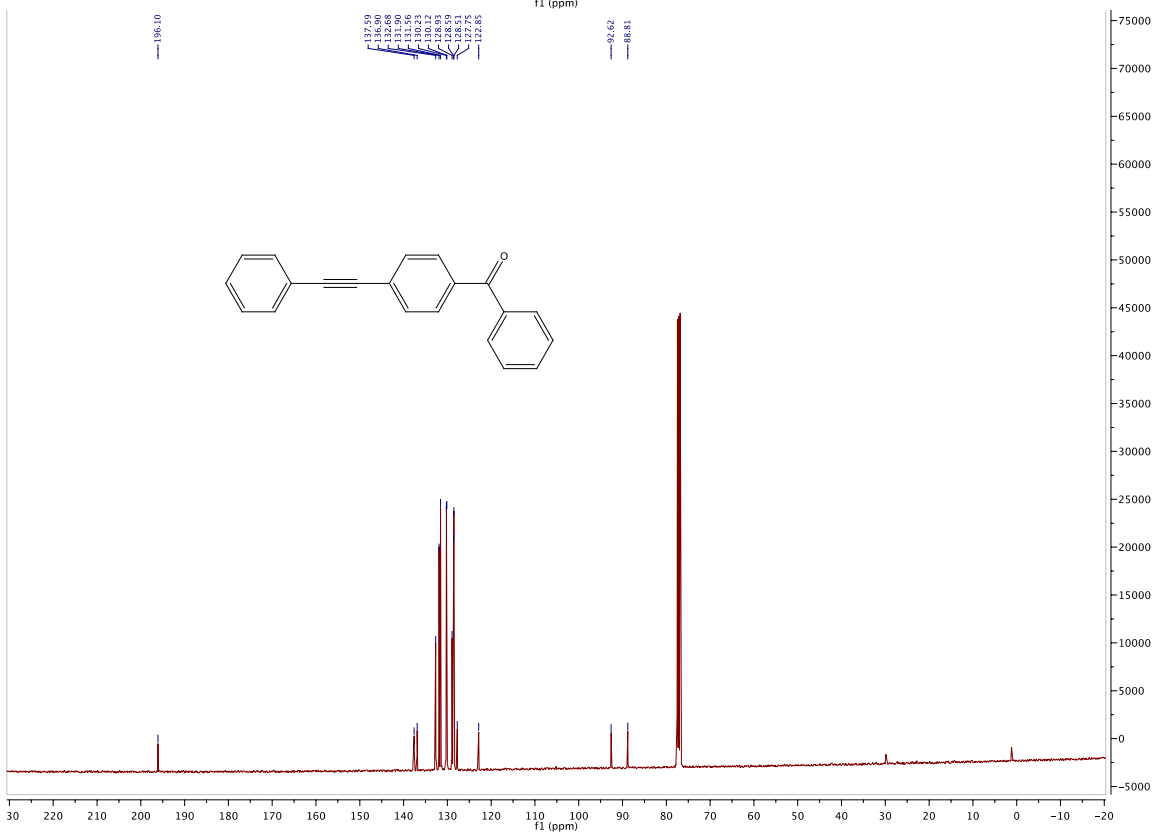

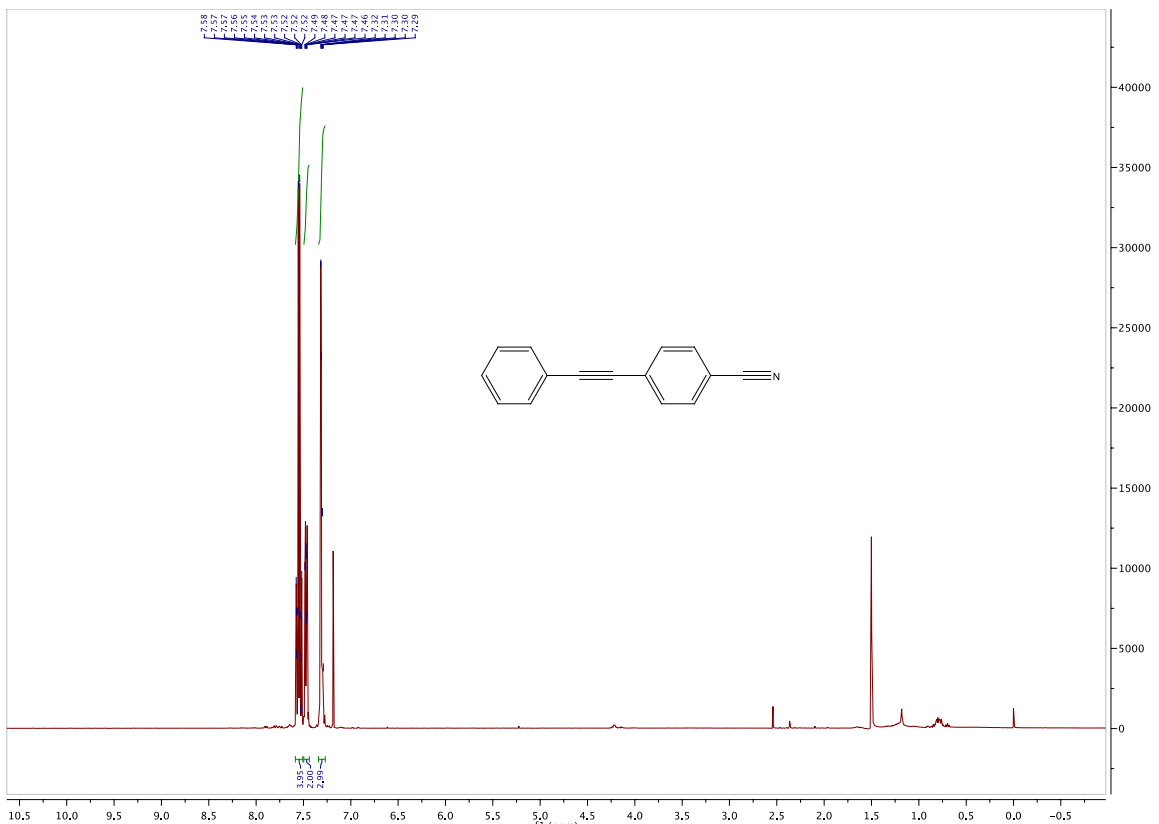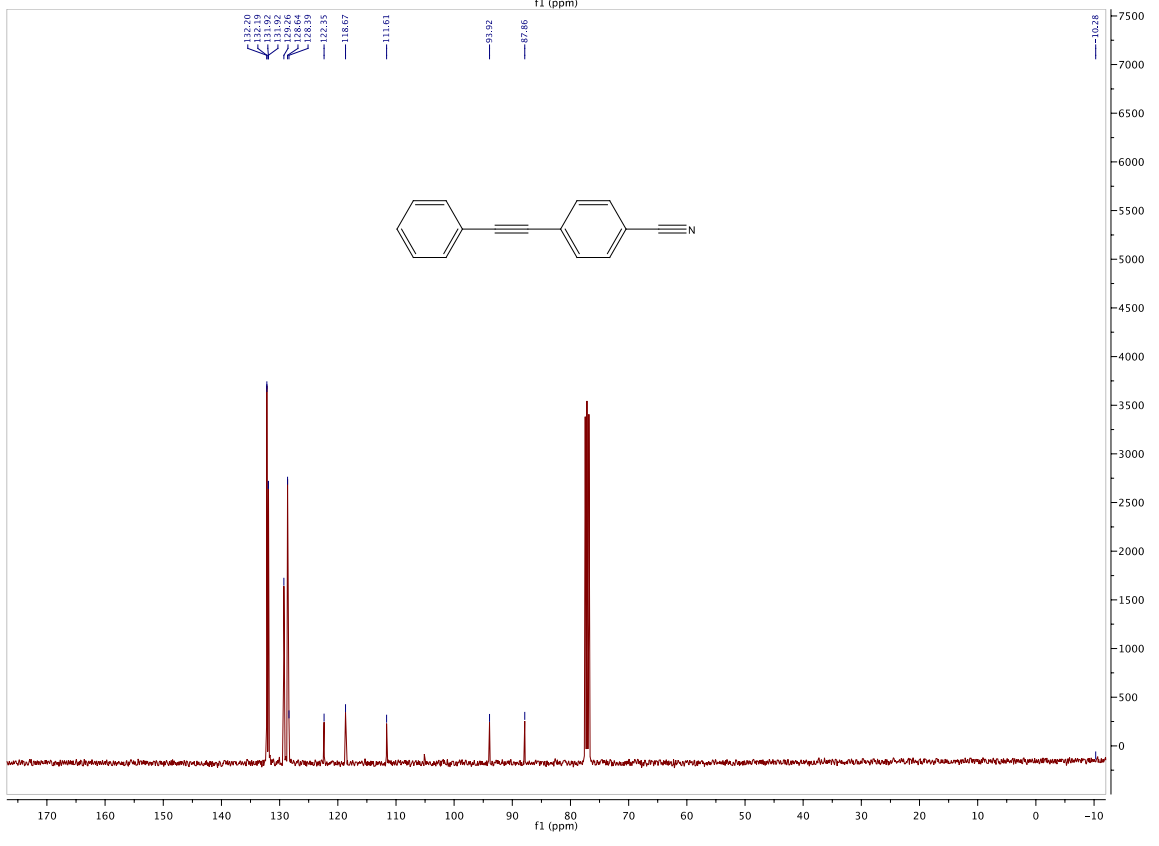

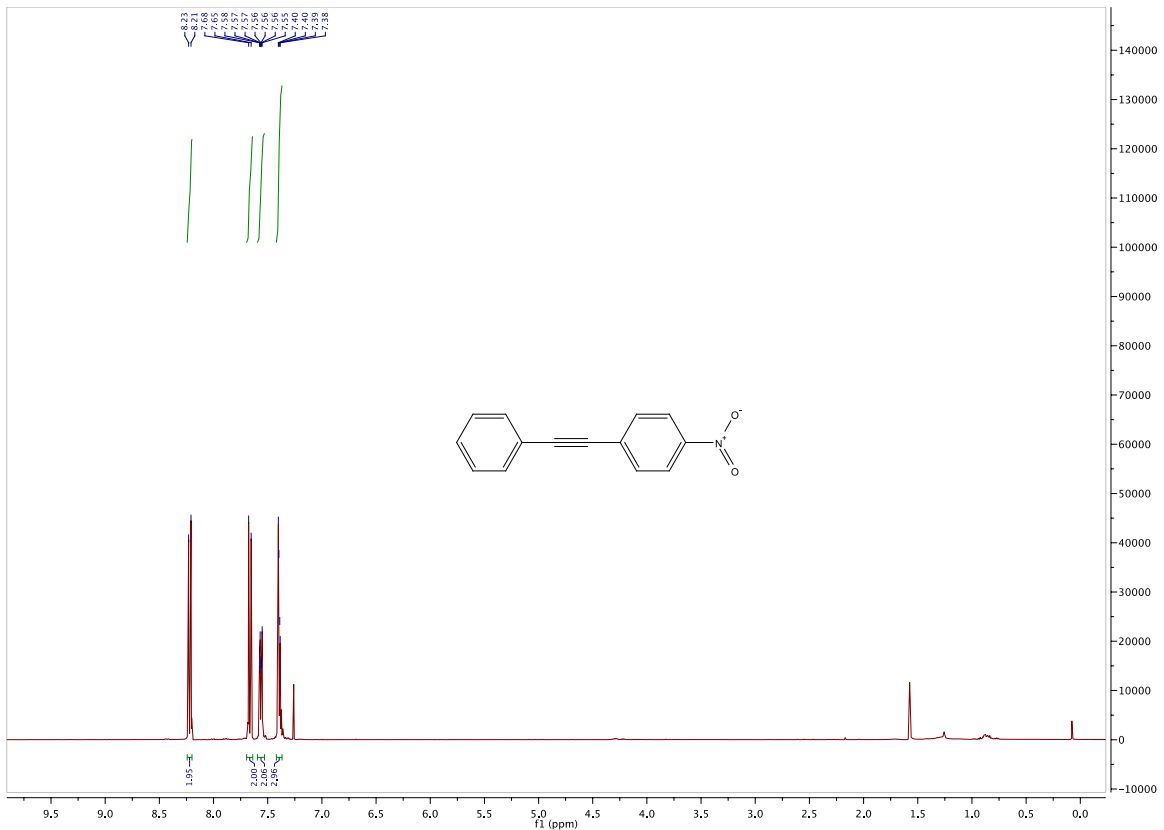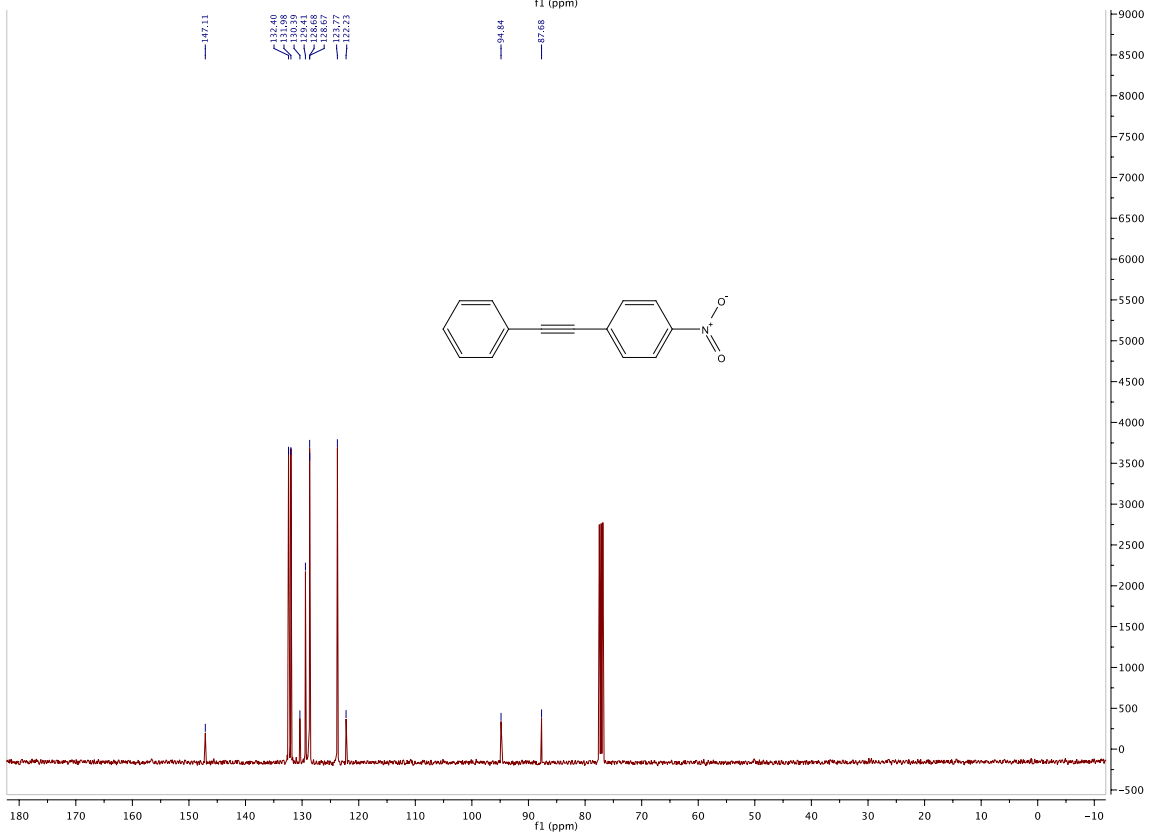

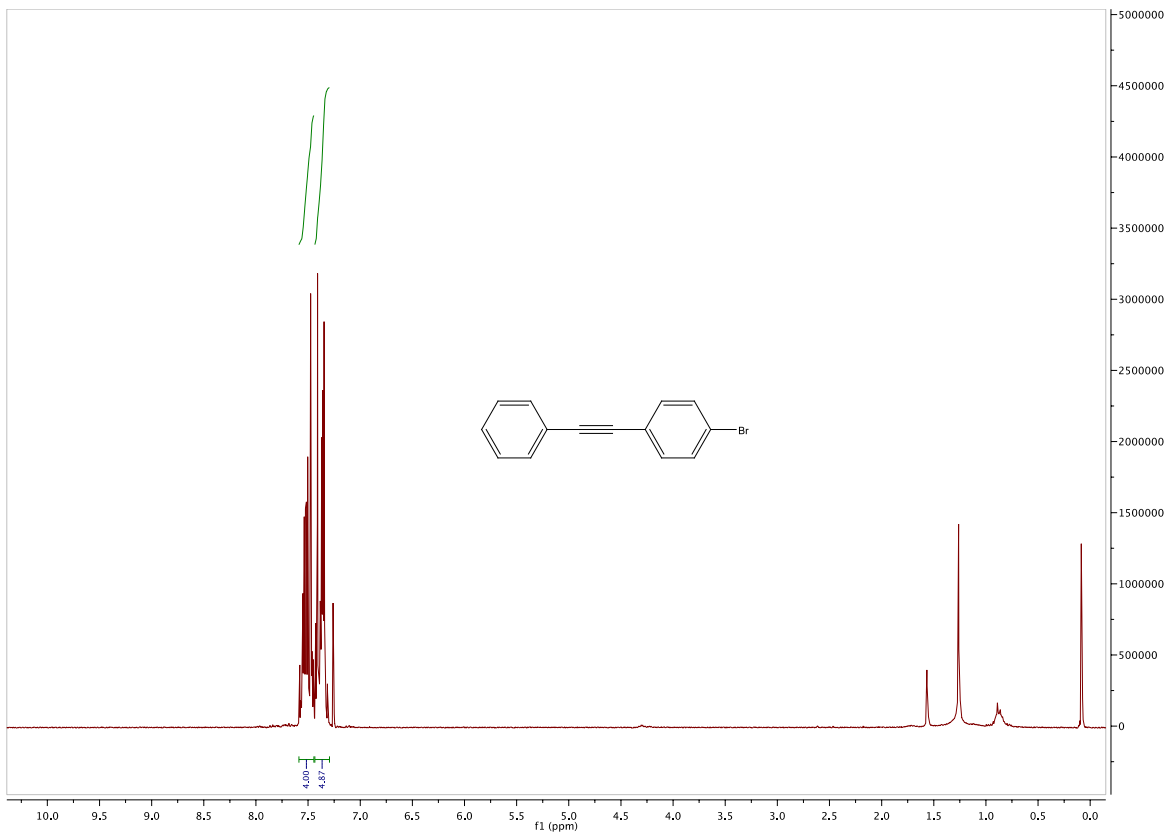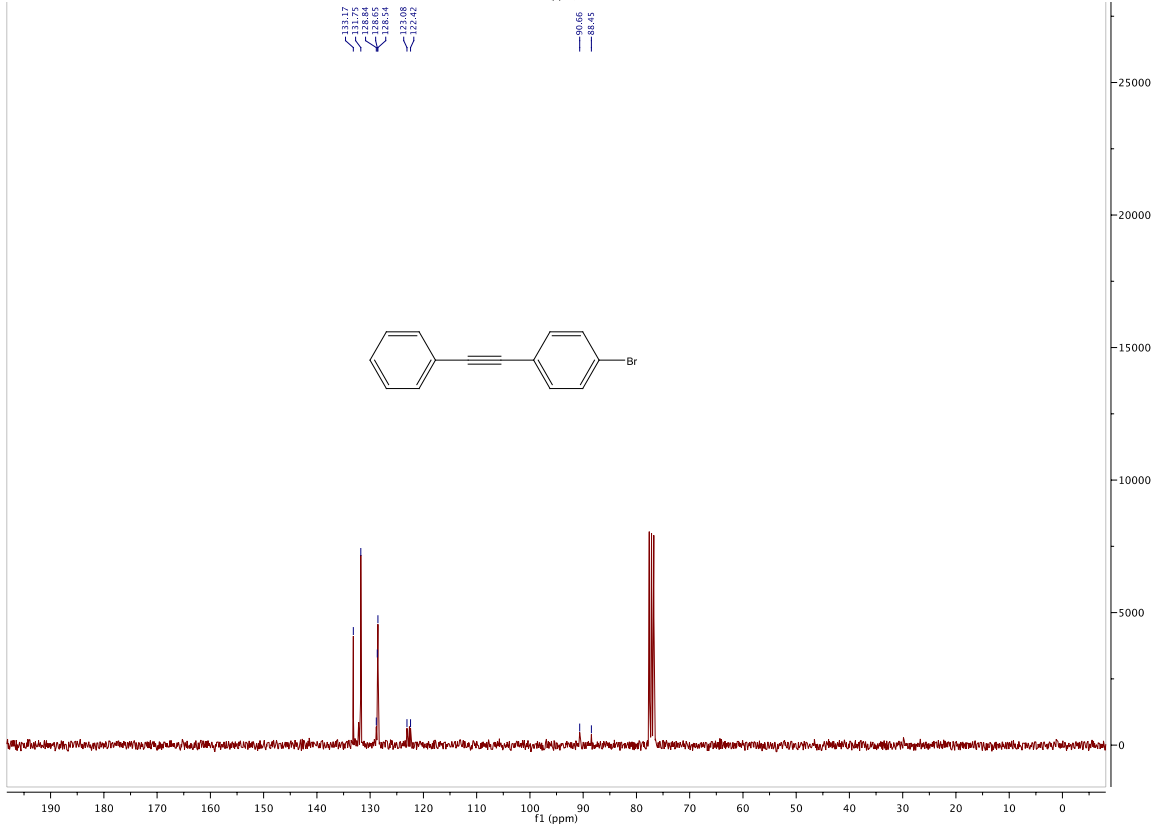



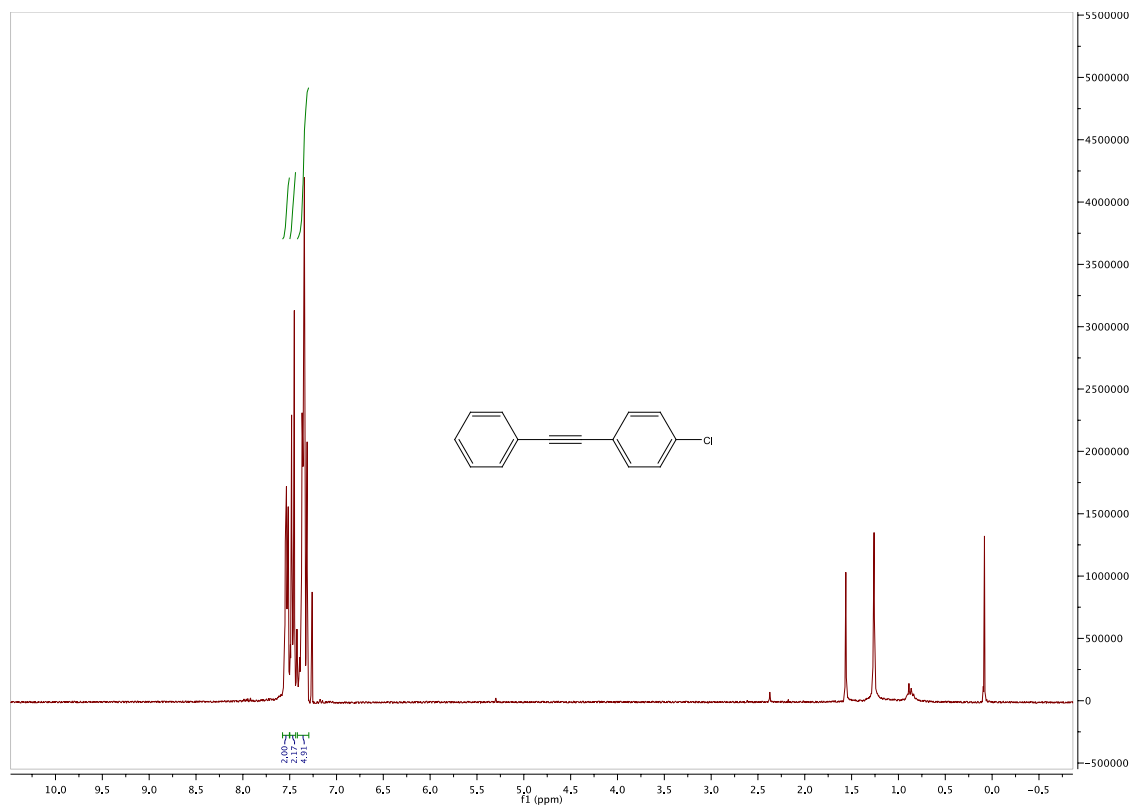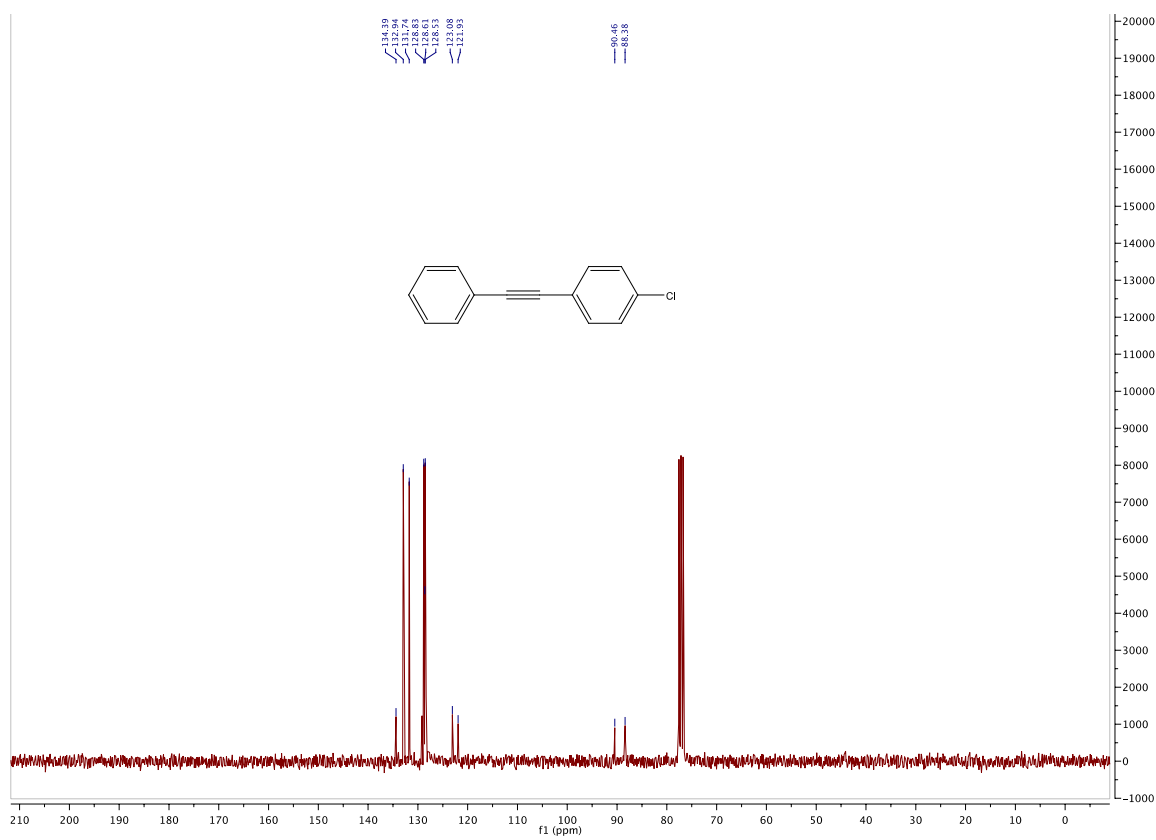

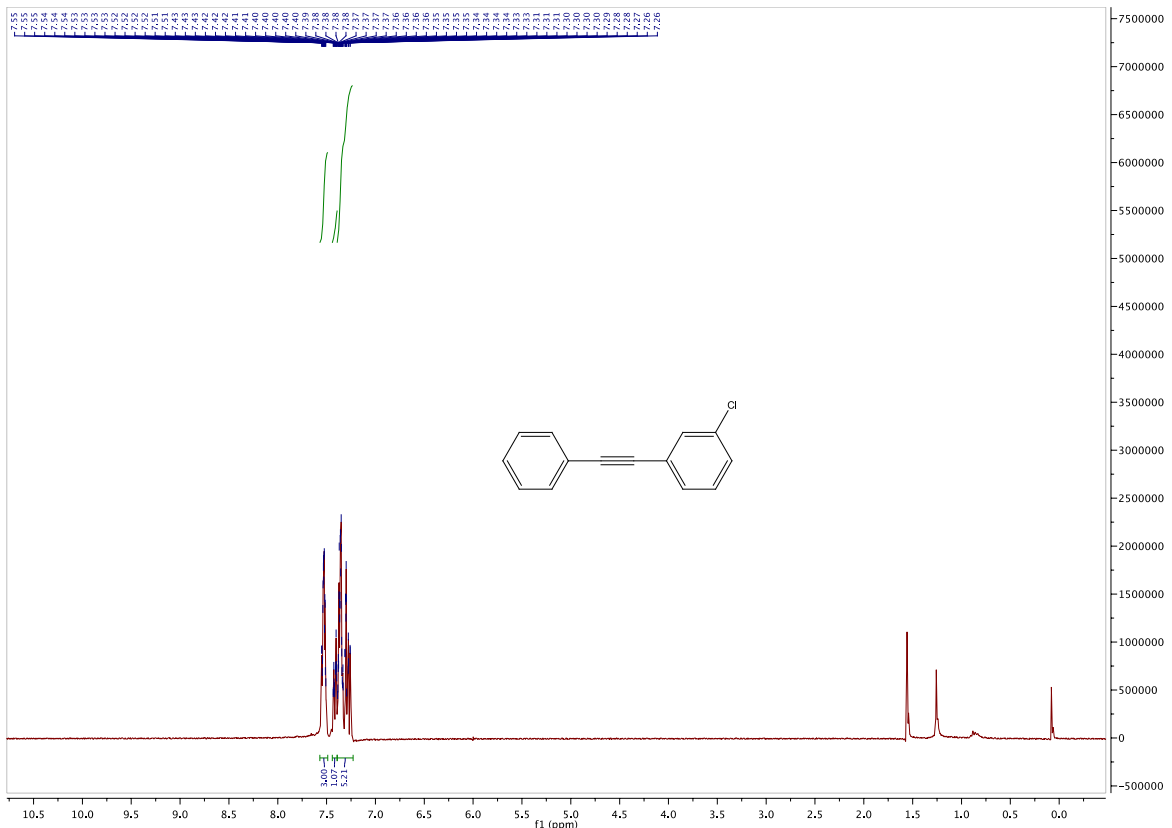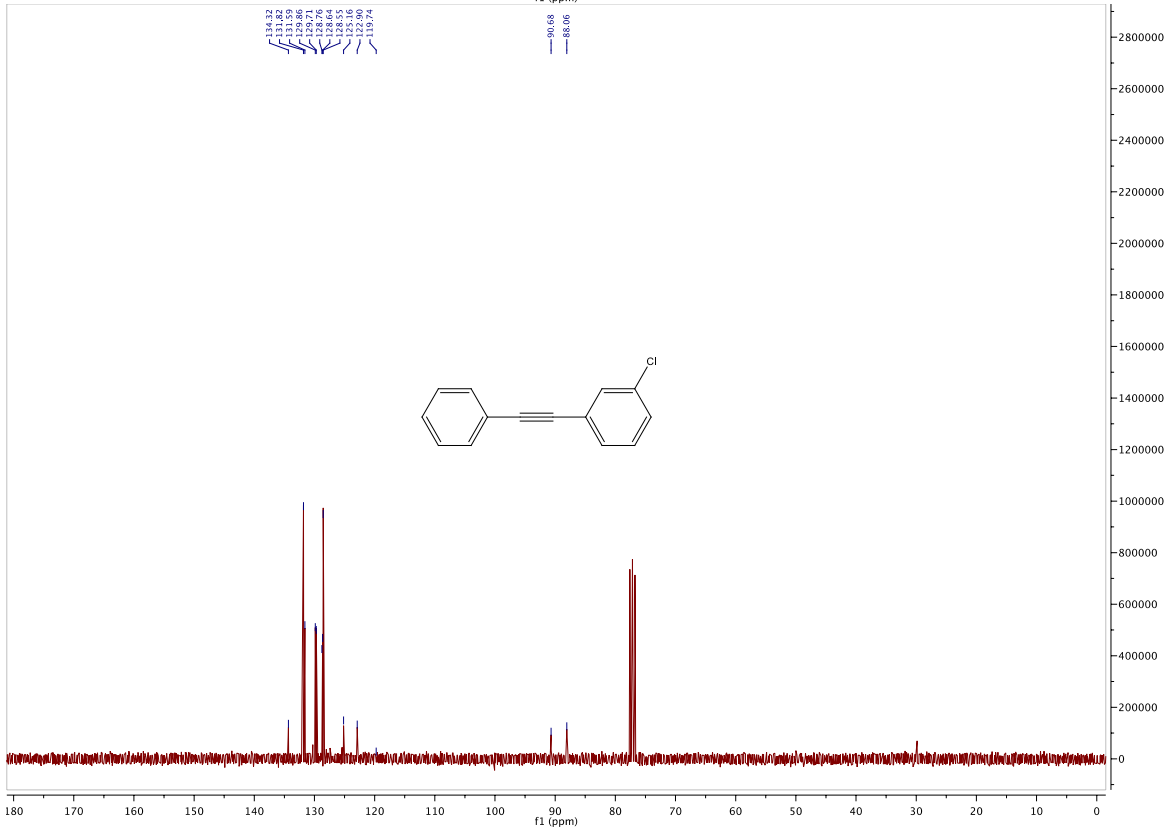

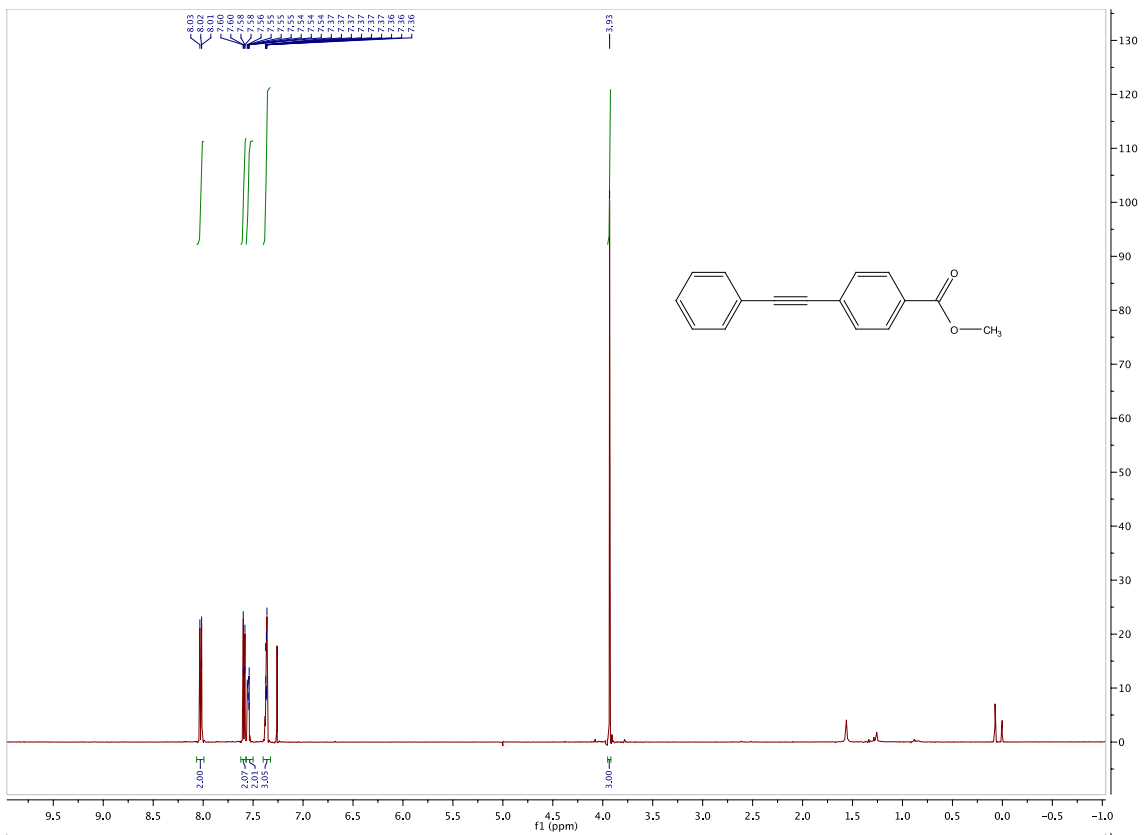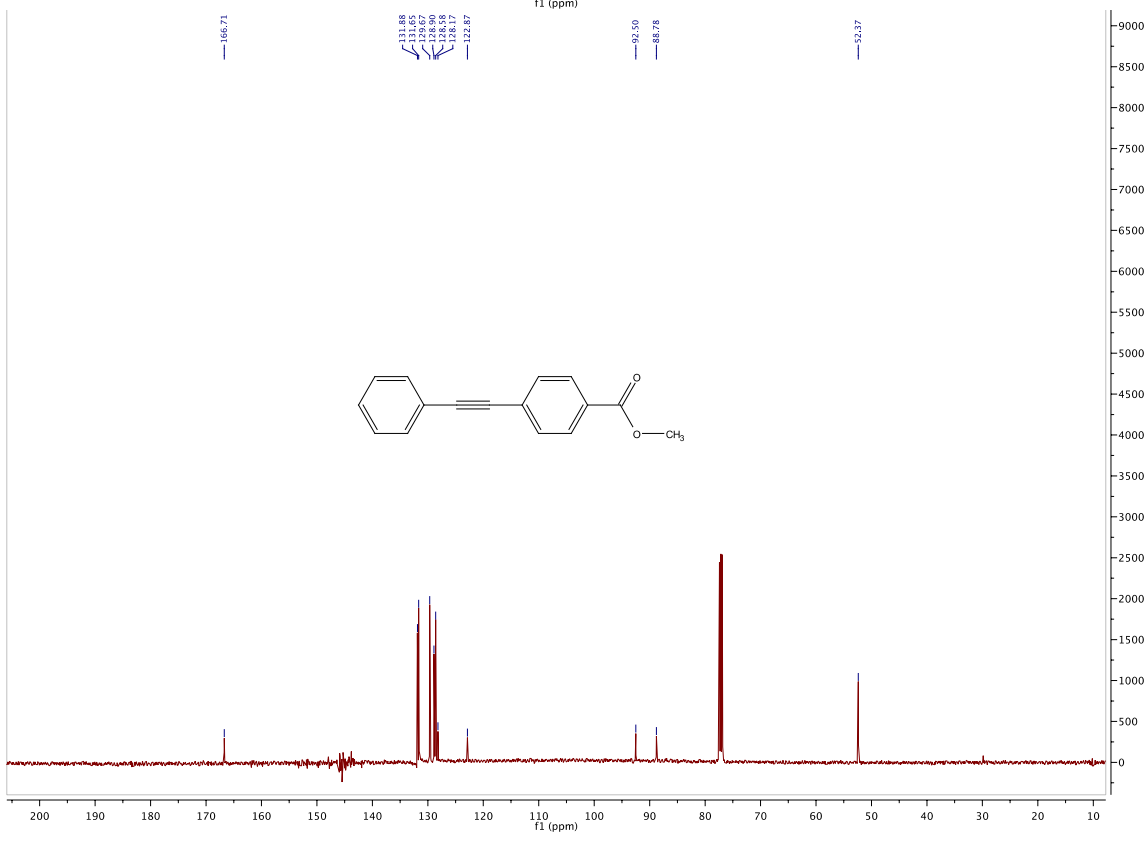

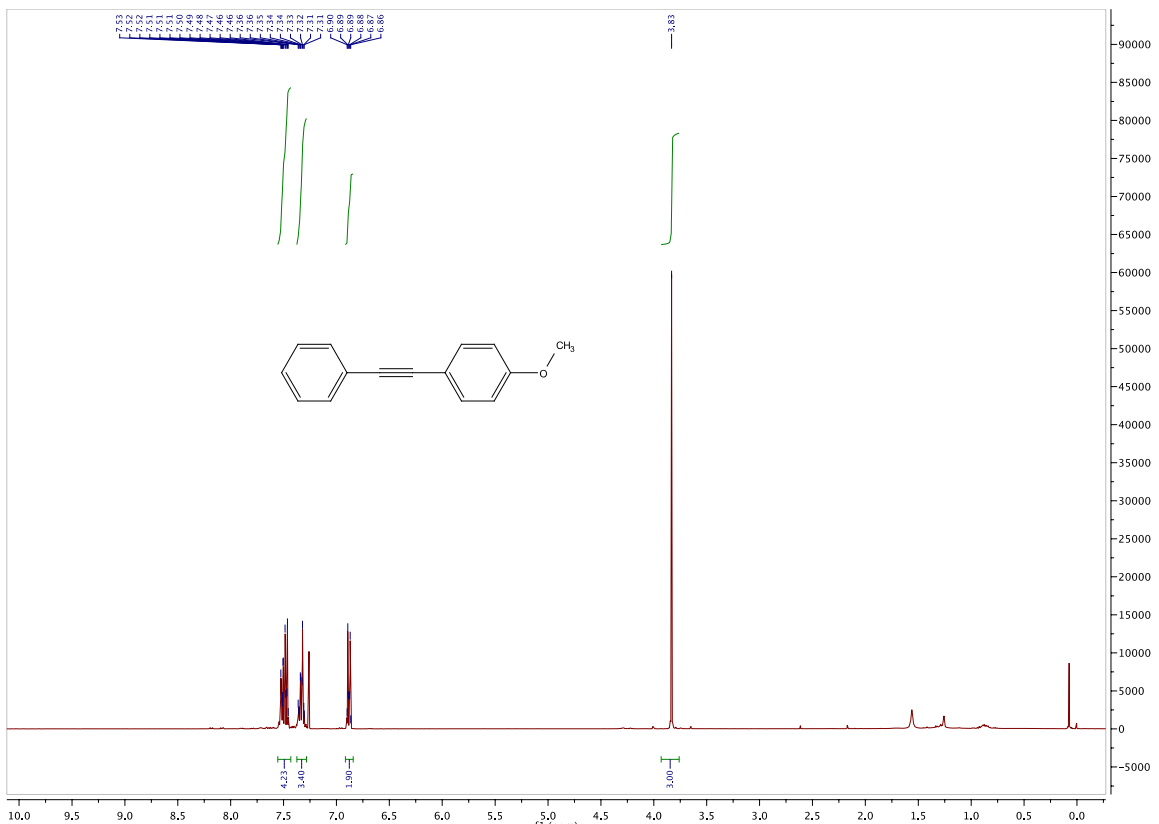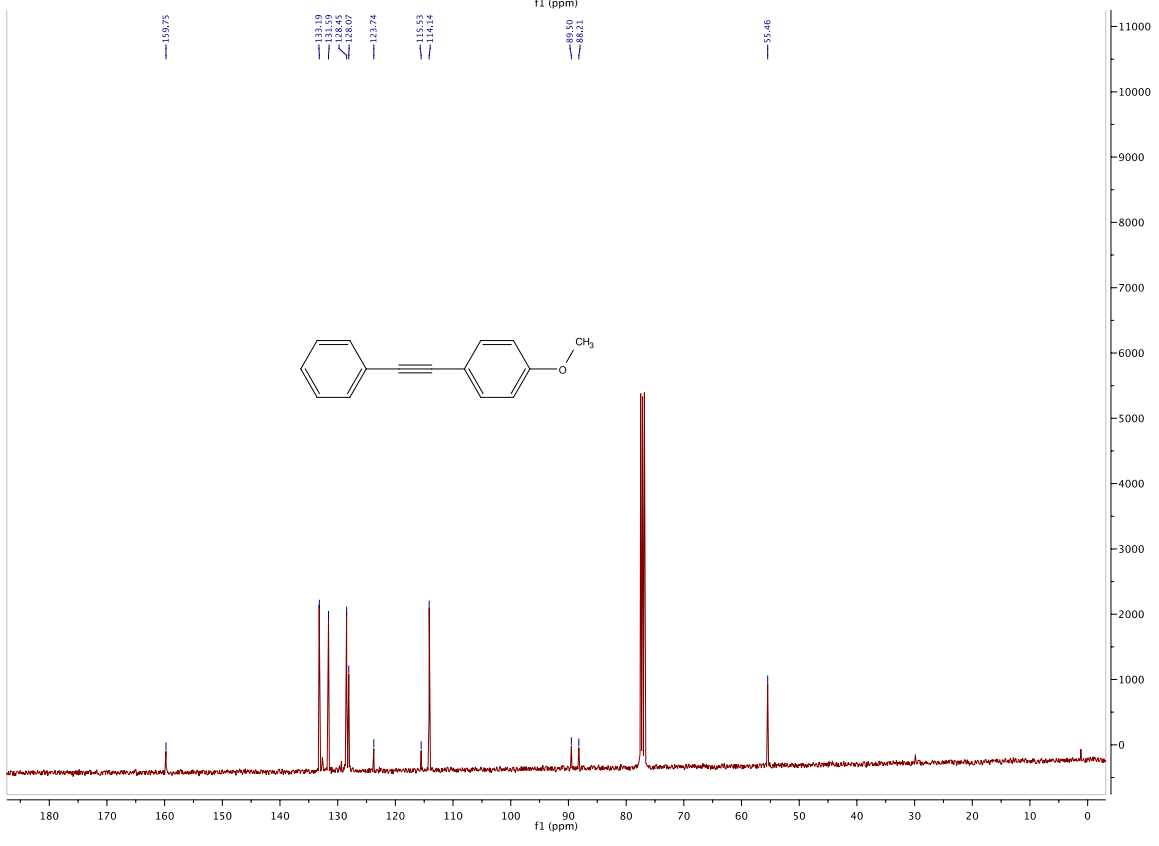

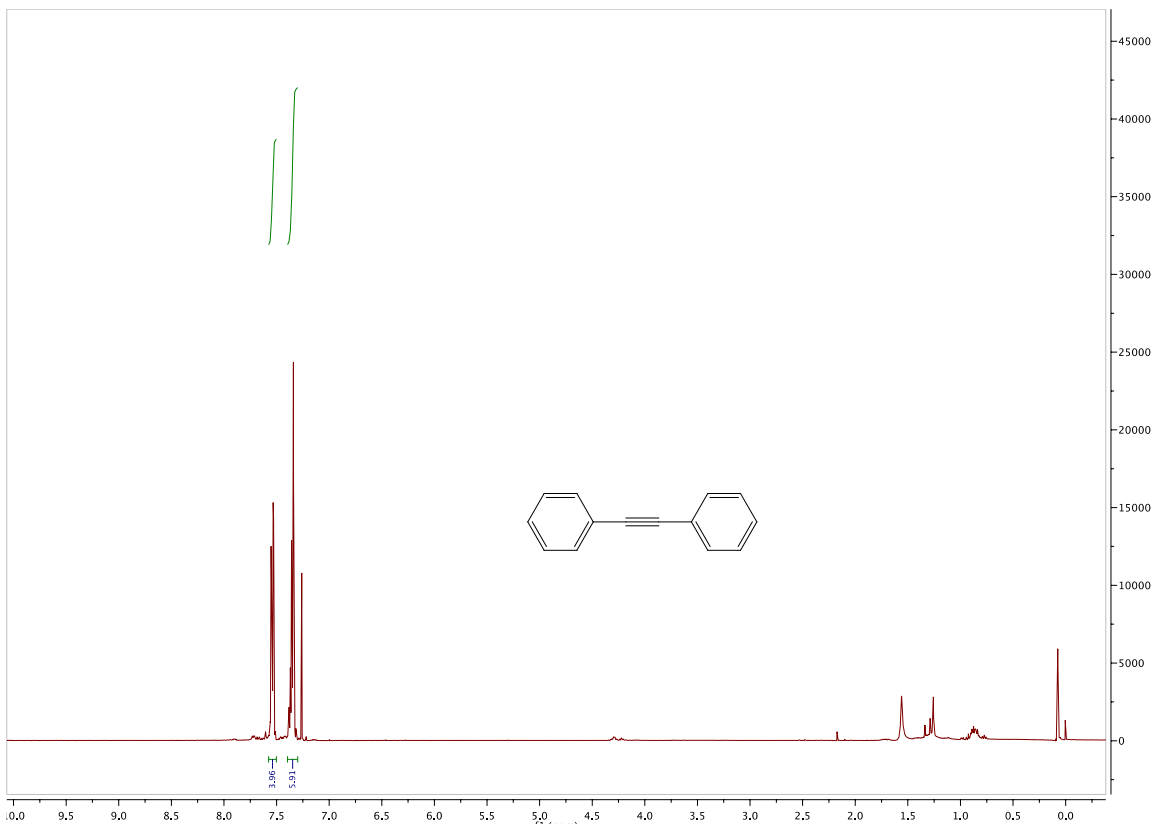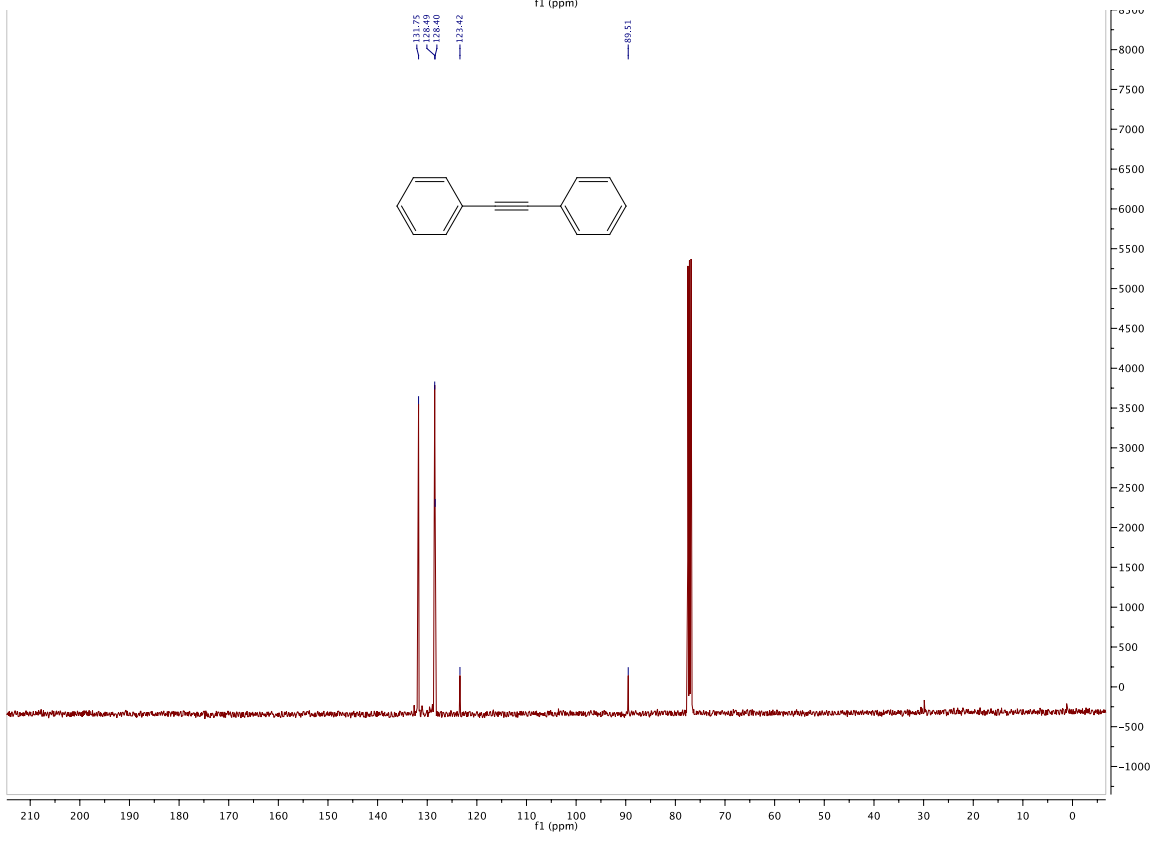

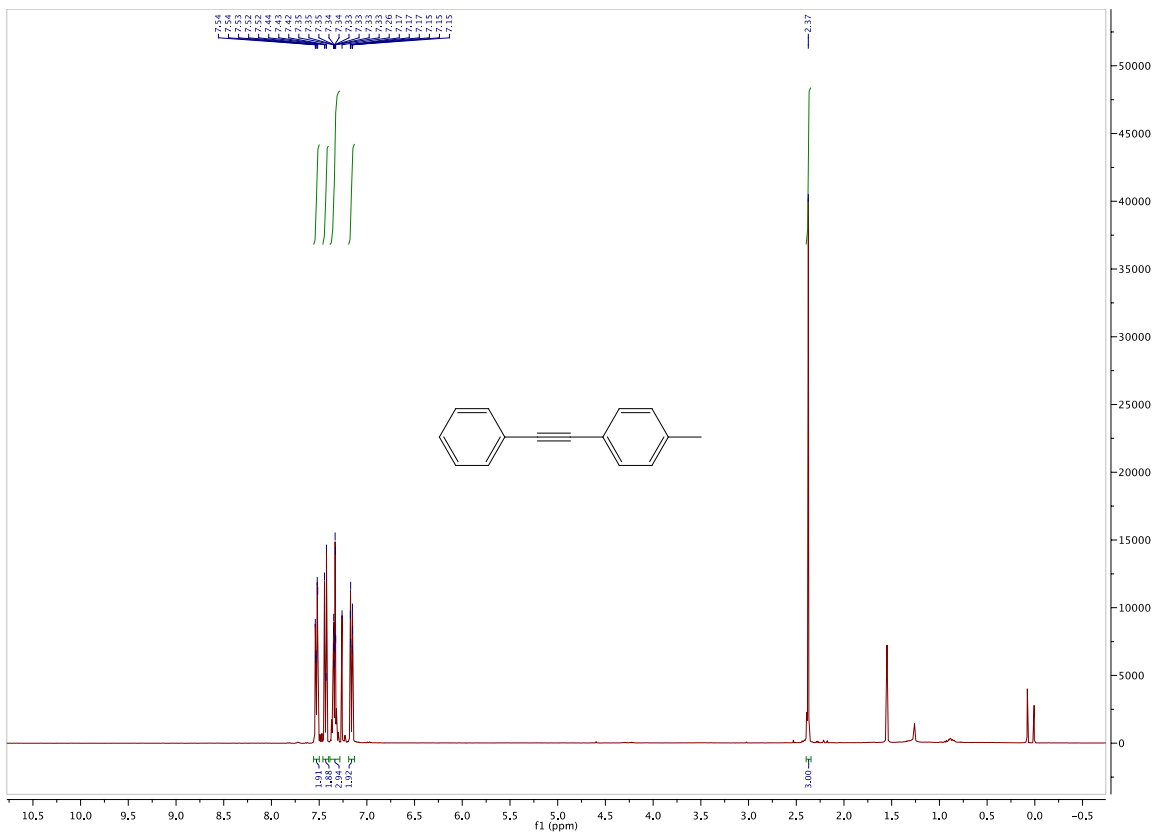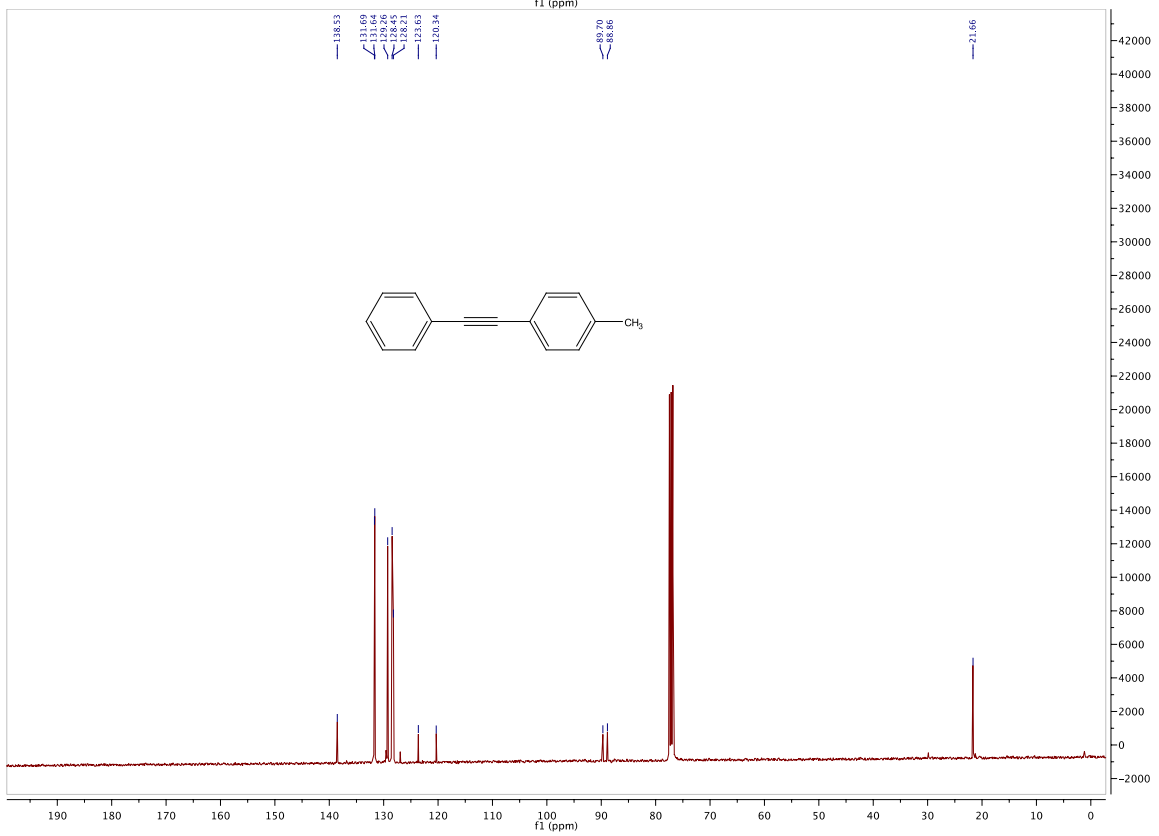

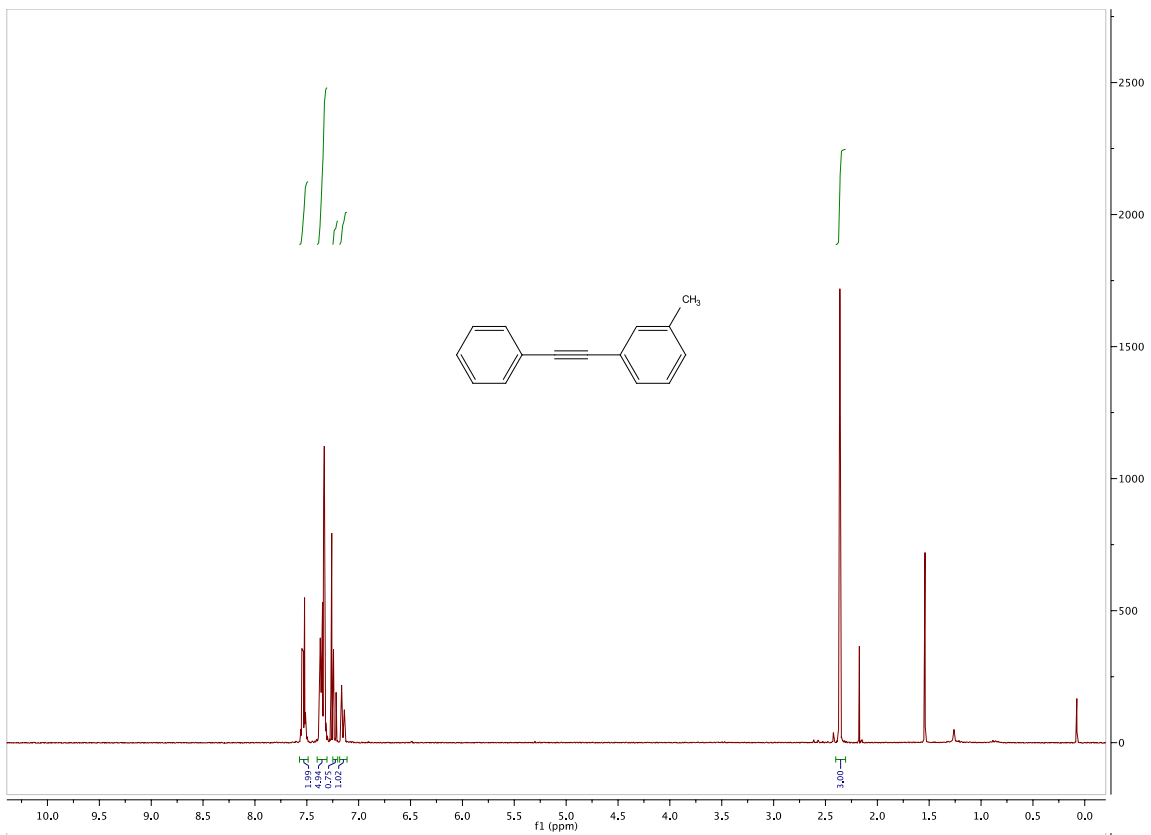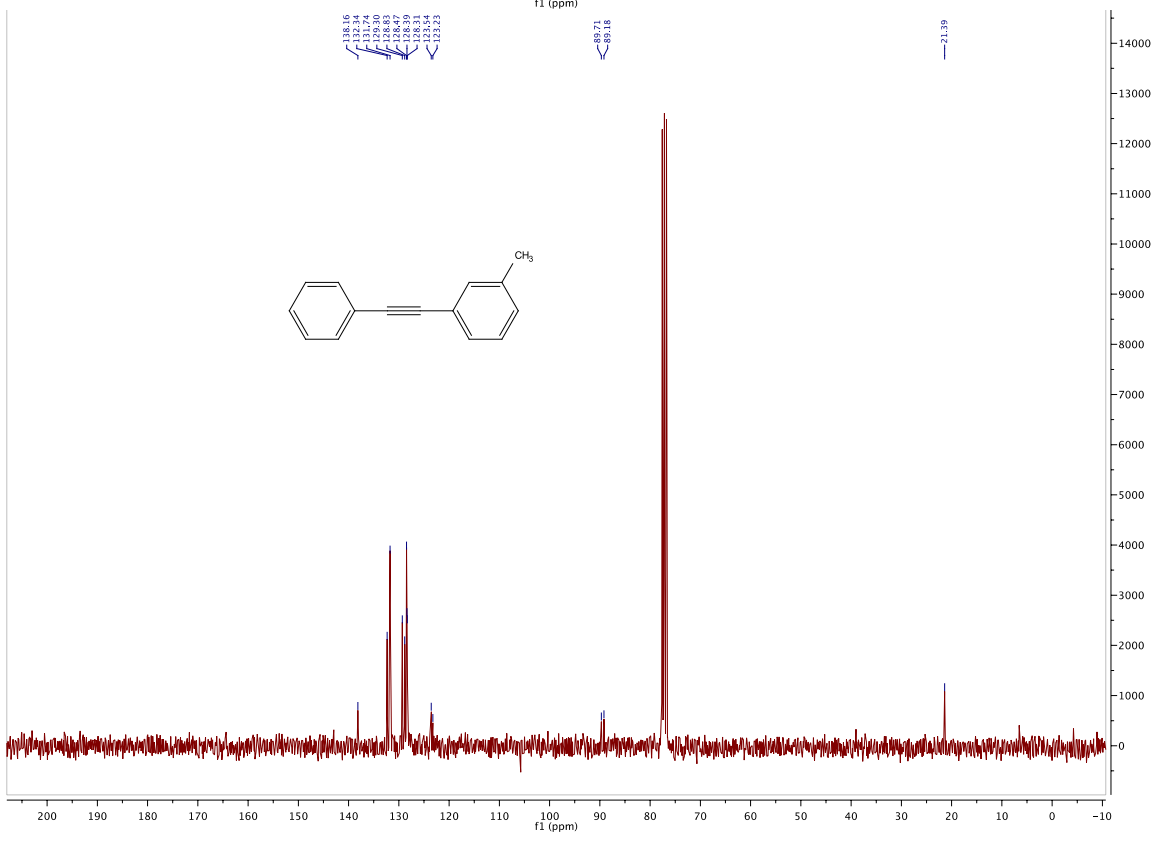

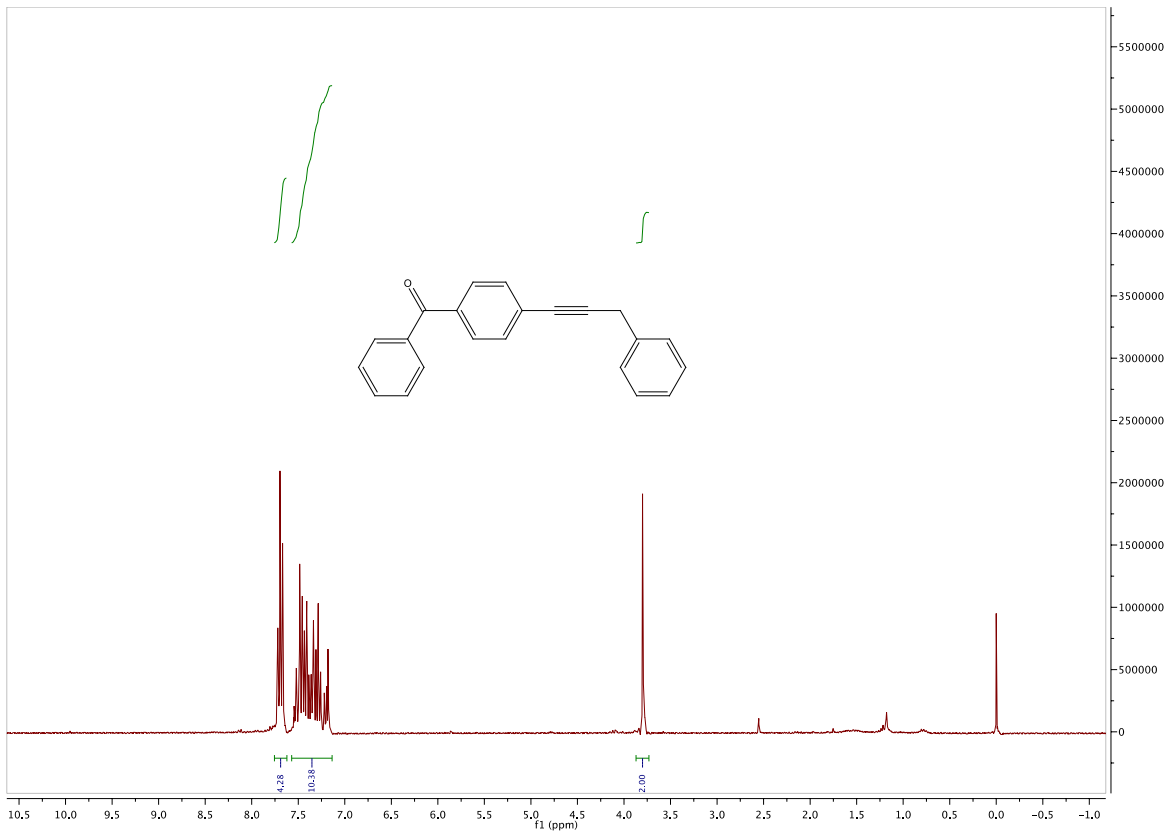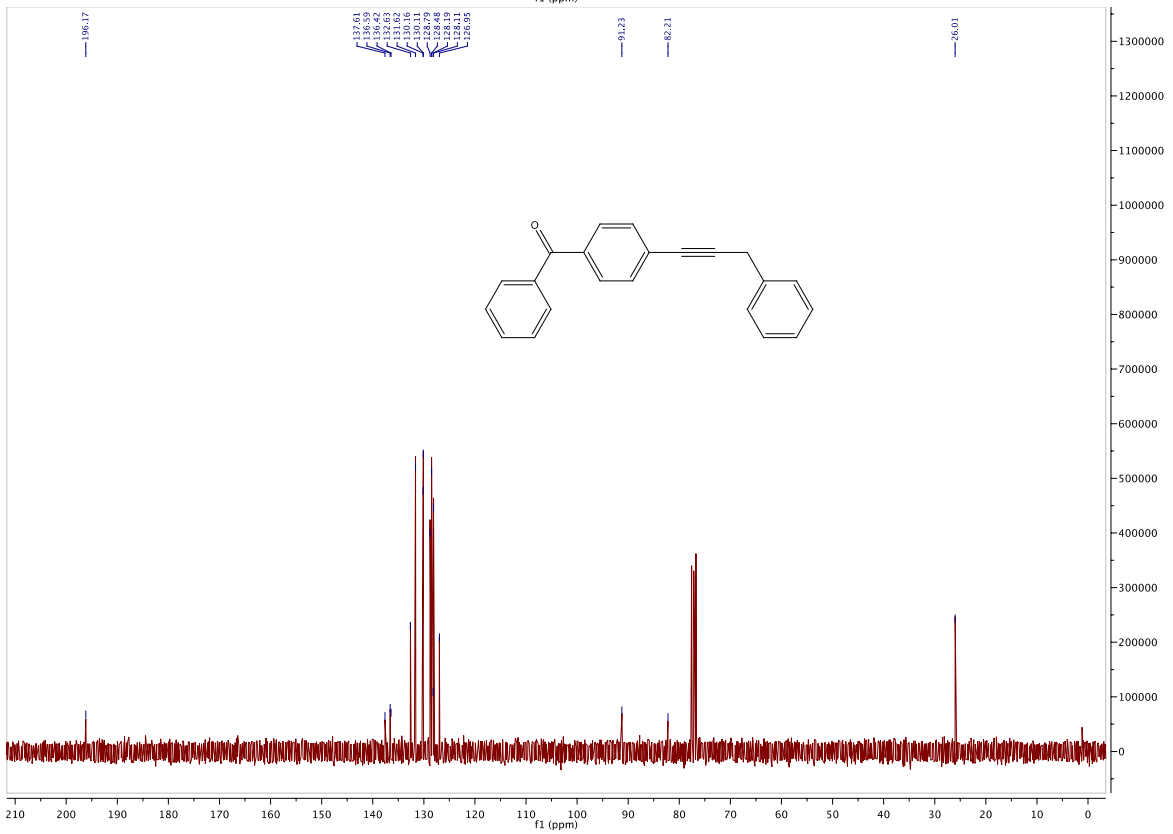





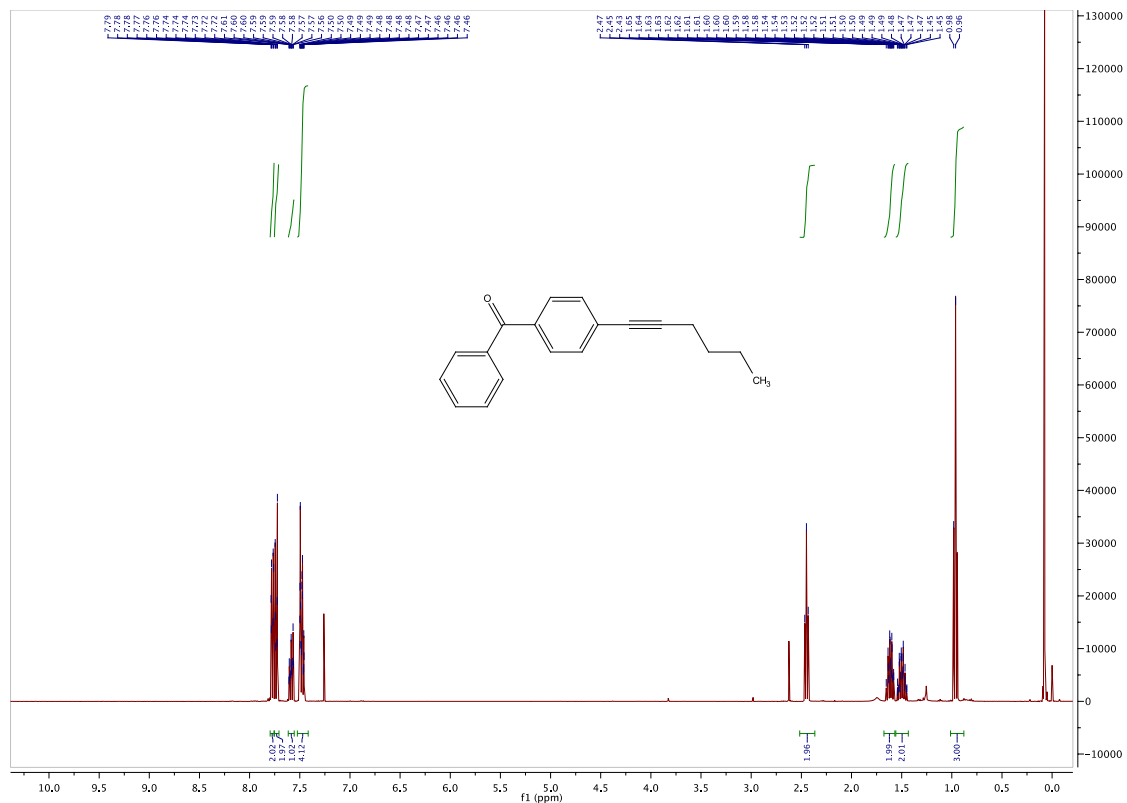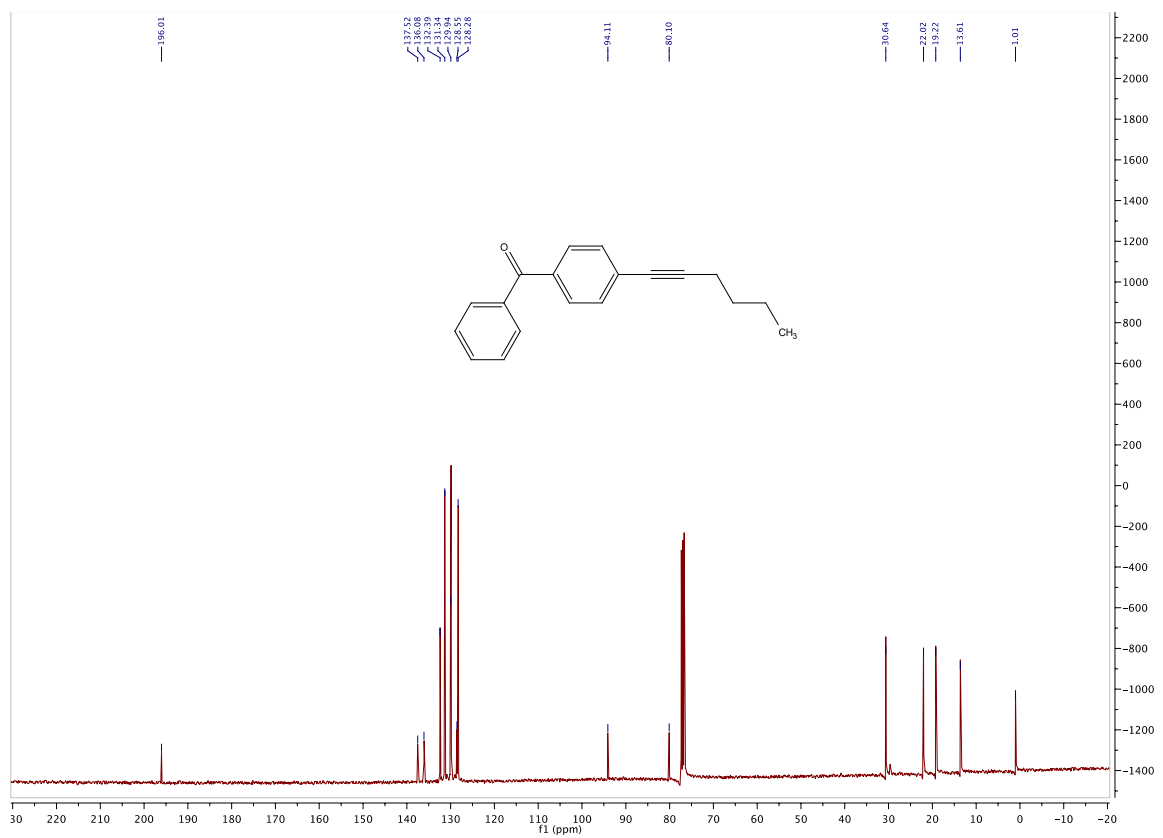

Supplement: c6cc03105f1.pdf [file c6cc03105f1.pdf]
